# Supplementary material for: Wnt Activation After Inhibition Restores Trabecular Meshwork Cells Toward a Normal Phenotype
Source: PubMed Central journal article supplement — Invest Ophthalmol Vis Sci. 2020 Jun 15;61(6):30. doi: 10.1167/iovs.61.6.30 (PMC7415288; doi:10.1167/iovs.61.6.30), 2020-06-15

**Wnt activation after inhibition restores trabecular meshwork cells towards a normal phenotype**

Kamesh Dhamodaran<sup>1,\*</sup>, Hasna Baidouri<sup>1,\*</sup>, Lyndsey Sandoval<sup>1</sup>, VijayKrishna Raghunathan<sup>1, 2,#</sup>

<sup>1</sup>Department of Basic Sciences, <sup>2</sup>The Ocular Surface Institute, College of Optometry, University of Houston, Houston, TX-USA.

\*Authors contributed equally and should be considered equal first authors.

#Correspondence should be sent to: [vraghunathan@uh.edu](mailto:vraghunathan@uh.edu)

**Supplementary Figure 1. Validation of TM cells with dexamethasone induced myocilin expression.**

Primary hTM cells were cultured in the absence or presence of 100 nM dexamethasone (Dex) for 3 days following which mRNA was isolated, qPCR performed to document expression of *MYOC*. Data are mean  $\pm$  standard deviation from 3 technical replicates for all 4 donor strains. \*\*\* $p < 0.001$ , t-test compared with control (EtOH).

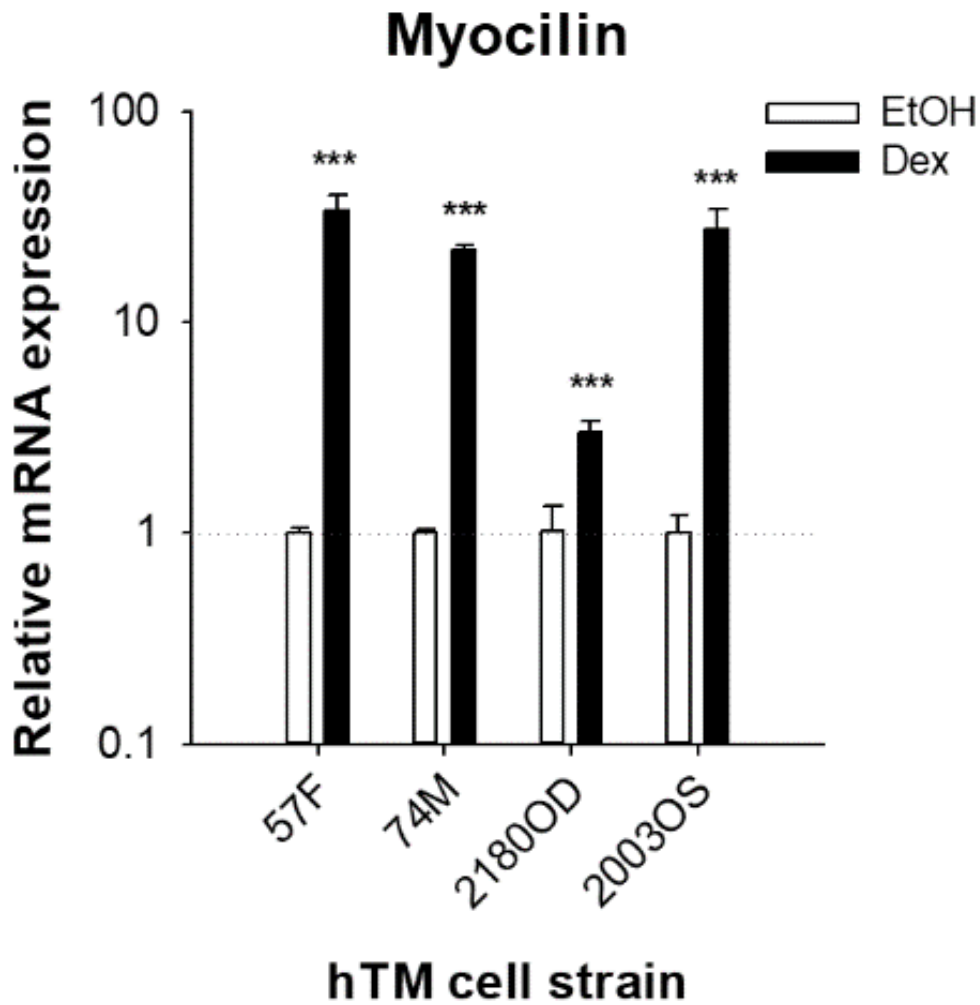

Supplement: iovs-61-6-30_s001.pdf [file iovs-61-6-30_s001.pdf]
